# Supplementary material for: Coordination complex of boron subphthalocyanine (BSubPc) with fluorenone pinacolate: effective π–π interaction of concave BSubPc macrocycle with fullerene C60
Source: Royal Society of Chemistry journal article supplement (doi:10.1039/c5ce00754b), 2015-01-01
Supplement: c5ce00754b1.pdf [file c5ce00754b1.pdf]

## Supporting information

### EXPERIMENTAL

#### Materials

B<sup>III</sup>SubPcCl (98%) was purchased from Aldrich. C<sub>60</sub> of 99.9 % purity was received from MTR Ltd. Sodium fluorenone ketyl was obtained as described.<sup>1</sup> Solvents were purified in argon atmosphere. *o*-Dichlorobenzene (C<sub>6</sub>H<sub>4</sub>Cl<sub>2</sub>) was distilled over CaH<sub>2</sub> under reduced pressure; hexane was distilled over Na/benzophenone. The solvents were degassed and stored in the glove box. All operations on the synthesis of **1** and the storage of crystals were carried out in a MBraun 150B-G glove box with controlled atmosphere and water and oxygen content less than 1 ppm. KBr pellets for IR- and UV-visible-NIR measurements were prepared in the glove box

#### General

UV-visible-NIR spectra were measured in KBr pellets on a Perkin Elmer Lambda 1050 spectrometer in the 250-2500 nm range. FT-IR spectra were obtained in KBr pellets with a Perkin-Elmer Spectrum 400 spectrometer (400-7800 cm<sup>-1</sup>). EPR spectra were recorded for sealed polycrystalline samples of **1** at 295 K with a JEOL JES-TE 200 X-band ESR spectrometer.

#### X-ray crystal structure determination

Crystal data of **1** at 100(2) K: C<sub>146</sub>H<sub>48</sub>B<sub>2</sub>Cl<sub>4</sub>N<sub>12</sub>O<sub>2</sub>, *M*<sub>r</sub> = 2165.38 g mol<sup>-1</sup>, black plate, monoclinic, *P* 2<sub>1</sub>, *a* = 15.4619(8), *b* = 16.9321(8), *c* = 19.6980(10) Å, β = 110.386(5)°, *V* = 4834.0(4) Å<sup>3</sup>, *Z* = 2, *d*<sub>calc</sub> = 1.488 g·cm<sup>-3</sup>, μ = 0.314 mm<sup>-1</sup>, *F*(000) = 2204, 2θ<sub>max</sub> = 69.50°, reflections measured 75952, unique reflections 21328, reflections with *I* > 2σ(*I*) = 16669, parameters refined 1708, restraints 2395, *R*<sub>1</sub> = 0.0808, *wR*<sub>2</sub> = 0.2045, G.O.F. = 1.005, CCDC 1046031.

The intensity data for **1** were collected on a MAR225 CCD detector using synchrotron radiation at the BESSY storage ring, BL 14.2 (λ = 0.9050 Å, PSF of the Free University of Berlin, Germany). The structures were solved by direct method and refined by the full-matrix

least-squares method against  $F^2$  using SHELX-97 package.<sup>2</sup> Non-hydrogen atoms were anisotropically refined. Positions of hydrogen atoms were included into refinement in a riding mode. See .....for crystallographic data in CIF. Structure of **1** contains two orientations of the  $C_{60}$  molecule having 0.537(5)/0.463(5) occupancies. One of two solvent  $C_6H_4Cl_2$  molecules disordered between two orientations with the 0.660(6)/0.340(6) occupancies. To keep geometry of disordered  $C_{60}$  and one  $C_6H_4Cl_2$  molecules close to ideal one restraints were applied for the refinement of the crystal structures of **1**.

## IR- spectra.

**Table S1.** IR-spectra (cm<sup>-1</sup> in KBr) of starting compounds and complex **1**.

|                                               | B <sup>III</sup> SubPcCl                                                                                                                                                                                     | C <sub>60</sub>                | (Na <sup>+</sup> )(Fluorenone <sup>-</sup> )                                                                                                                               | C <sub>6</sub> H <sub>4</sub> Cl <sub>2</sub> | <b>1</b>                                                                                                                                                                                                         |
|-----------------------------------------------|--------------------------------------------------------------------------------------------------------------------------------------------------------------------------------------------------------------|--------------------------------|----------------------------------------------------------------------------------------------------------------------------------------------------------------------------|-----------------------------------------------|------------------------------------------------------------------------------------------------------------------------------------------------------------------------------------------------------------------|
| B <sup>III</sup> SubPc                        | 444w<br>631w<br>697w<br>750vs<br>758m<br>797w<br>880w<br>951m<br>960m<br>1088w<br>1130s<br>1150w<br>1196w<br>1231m<br>1281s<br>1321w<br>1386m<br>1432s<br>1440s<br>1453s<br>1491w<br>2853w<br>2925w<br>3058w |                                |                                                                                                                                                                            |                                               | 437w*<br>596w<br>696w<br>737vs*<br>760m*<br>805w<br>881w<br>943w<br>-<br>1084s*<br>1130s*<br>1154w*<br>1196w<br>1229w<br>1289w<br>1326w<br>1388w*<br>1431s*<br>-<br>1457s*<br>1496w*<br>2850w<br>2920w<br>3058w* |
| C <sub>60</sub>                               |                                                                                                                                                                                                              | 526s<br>576m<br>1182m<br>1429s |                                                                                                                                                                            |                                               | 527m<br>575w<br>1181w<br>1431s*                                                                                                                                                                                  |
| Fluorenone <sup>-</sup>                       |                                                                                                                                                                                                              |                                | 439w<br>671w<br>723vs<br>735s<br>756w<br>922s<br>989m<br>1080m<br>1151w<br>1197w<br>1392m<br>1400m<br>1439m<br>1453s<br>1492m<br>1594s<br>1651m<br>1675m<br>1714m<br>3058w |                                               | 437w*<br>673w<br>-<br>737vs*<br>760m*<br>-<br>-<br>1084s*<br>1154w*<br>1196w*<br>1388w*<br>-<br>1431s*<br>1457s*<br>1496w*<br>-<br>1630m<br>3058w*                                                               |
| C <sub>6</sub> H <sub>4</sub> Cl <sub>2</sub> |                                                                                                                                                                                                              |                                |                                                                                                                                                                            | 657w<br>748s<br>1030m<br>1122m<br>1453m       | 657w<br>737vs*<br>1034w<br>1130s*<br>1457s*                                                                                                                                                                      |

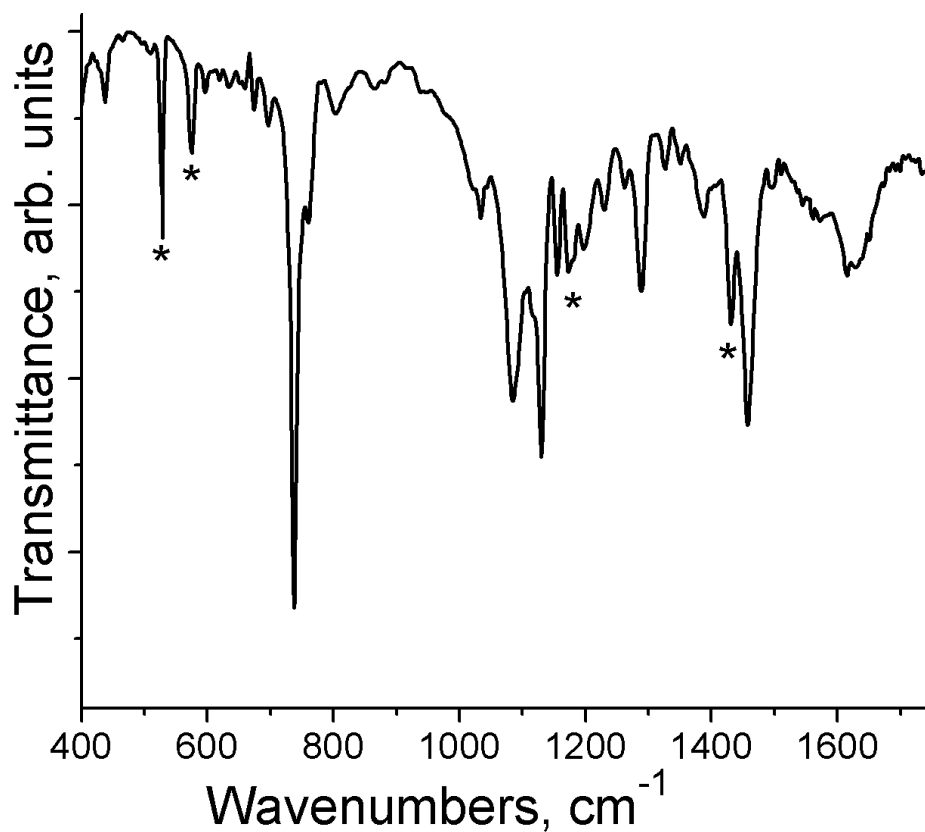

**Figure S1.** IR-spectrum of complex **1** in KBr pellet prepared in anaerobic conditions. Absorption bands of C<sub>60</sub> are marked by asterisks.

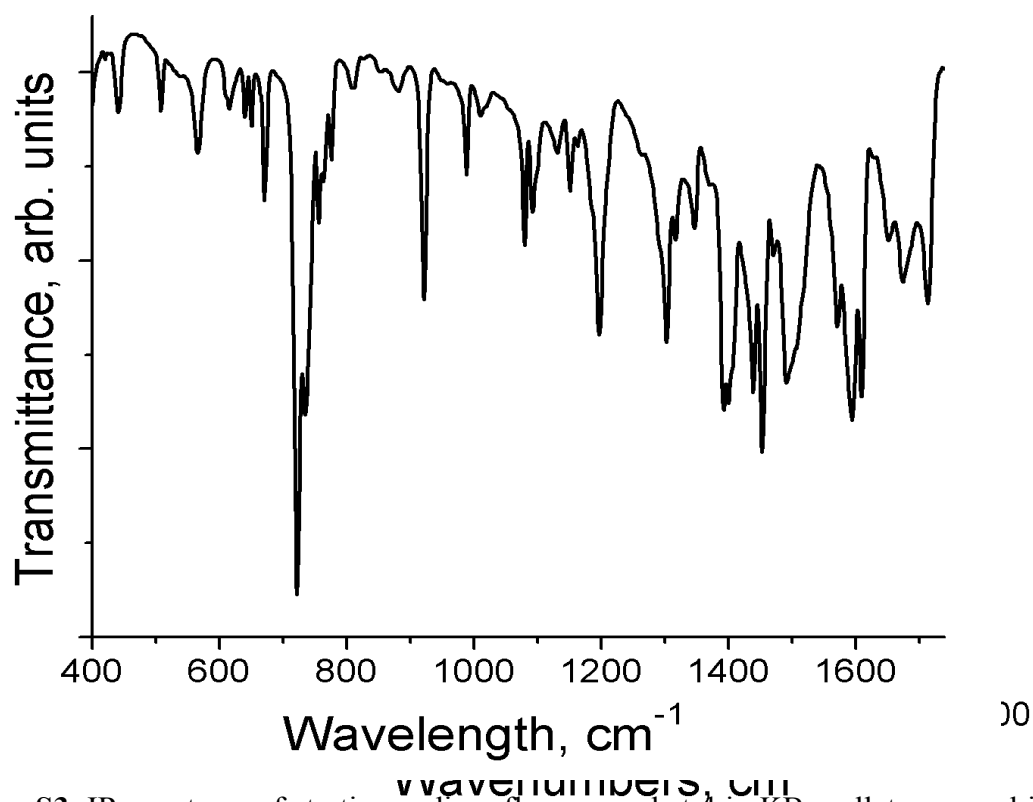

**Figure S3.** IR-spectrum of starting sodium fluorenone ketyl in KBr pellet prepared in anaerobic conditions.  
**Figure S2.** IR-spectrum of starting B<sup>III</sup>SubPcCl in KBr pellet.
